# Supplementary material for: Preparation of CO2-switchable graphene dispersions and their polystyrene nanocomposite latexes by direct exfoliation of graphite using hyperbranched polyethylene surfactants
Source: Royal Society of Chemistry journal article supplement (doi:10.1039/c6py00638h), 2016-01-01
Supplement: c6py00638h1.pdf [file c6py00638h1.pdf]

*Supporting Information*

Preparation of CO<sub>2</sub>-Switchable Graphene Dispersions and Their  
Polystyrene Nanocomposite Latexes by Direct Exfoliation of  
Graphite Using Hyperbranched Polyethylene Surfactants

Su Yan,<sup>a</sup> Qi Zhang,<sup>b</sup> Wen-Jun Wang,<sup>a,\*</sup> and Bo-Geng Li<sup>a</sup>

<sup>a</sup> State Key Lab of Chemical Engineering, College of Chemical and Biological Engineering,  
Zhejiang University, Hangzhou, China, 310027

<sup>b</sup> College of Chemical Engineering, Zhejiang University of Technology, Hangzhou, China, 310014

\*(W.-J.W.) Tel: +86-571-8795-2772; Fax: +86-571-8795-2772; e-mail: wenjunwang@zju.edu.cn.

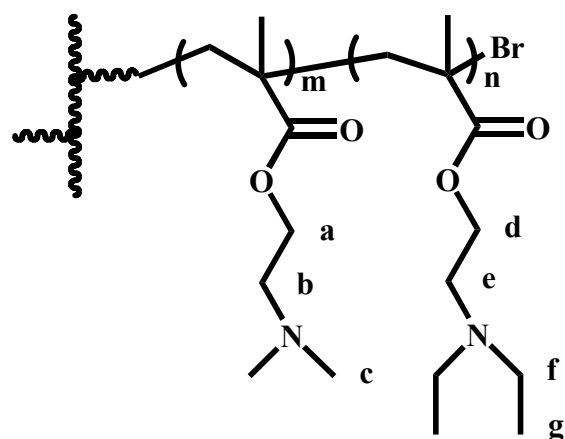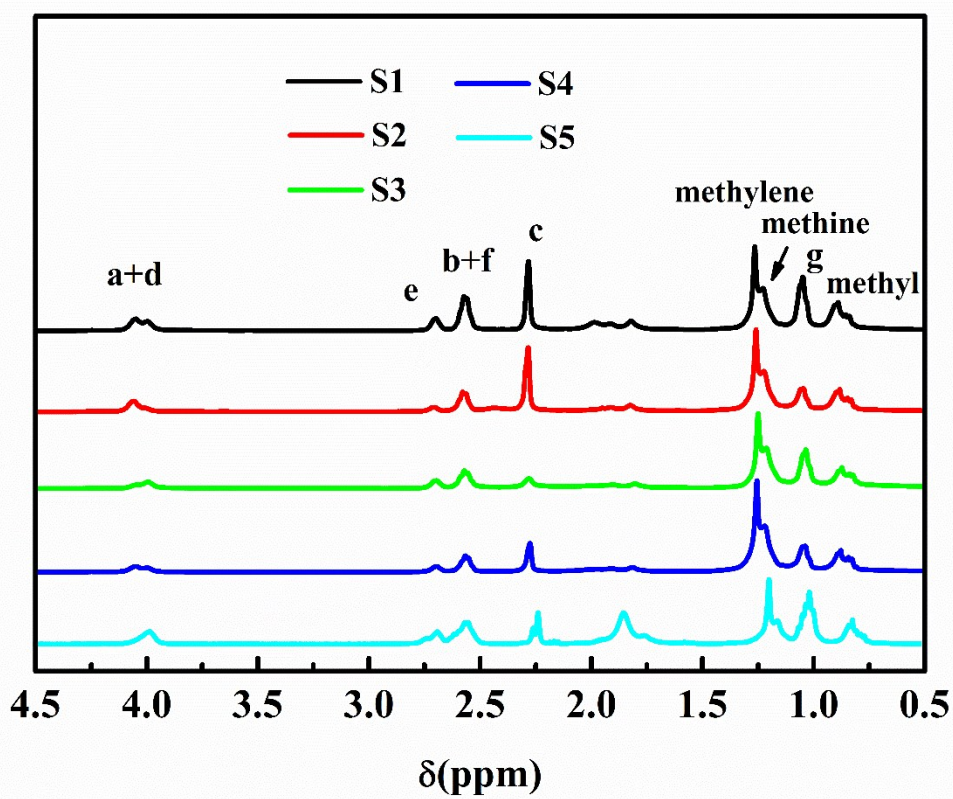

**Figure S1.**  $^1\text{H}$  NMR spectra of HBPE-P(DMAEMA-*co*-DEAEMA) star copolymer S1-5 with  $\text{CDCl}_3$  as deuterated solvent

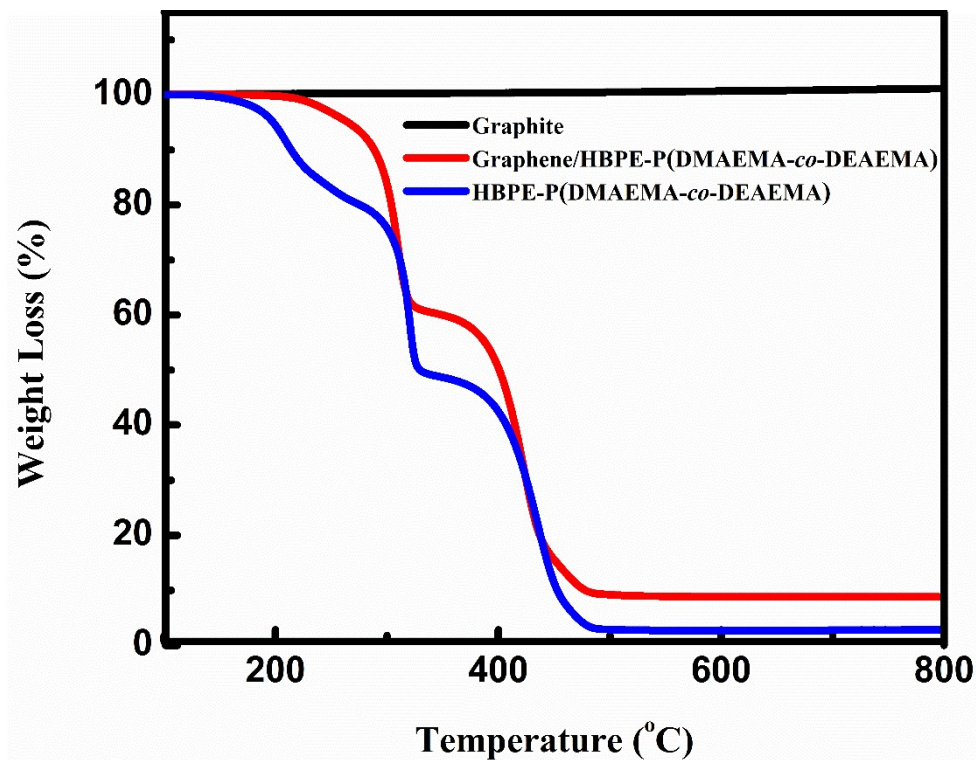

**Figure S2.** TGA thermograms of (a) pristine graphite, (b) graphene/HBPE-P(DMAEMA-co-DEAEMA) dried mixture from dispersion of D3, and (c) HBPE-P(DMAEMA-co-DEAEMA) sample S3.

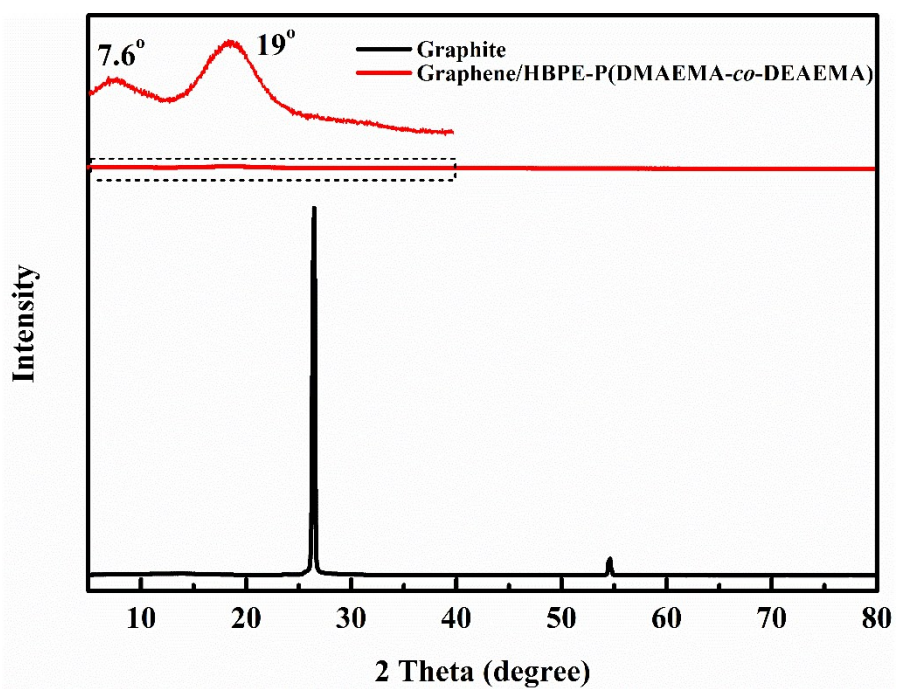

**Figure S3.** XRD patterns of pristine graphite and graphene/HBPE-P(DMAEMA-*co*-DEAEMA) dried mixtures from dispersion D3.

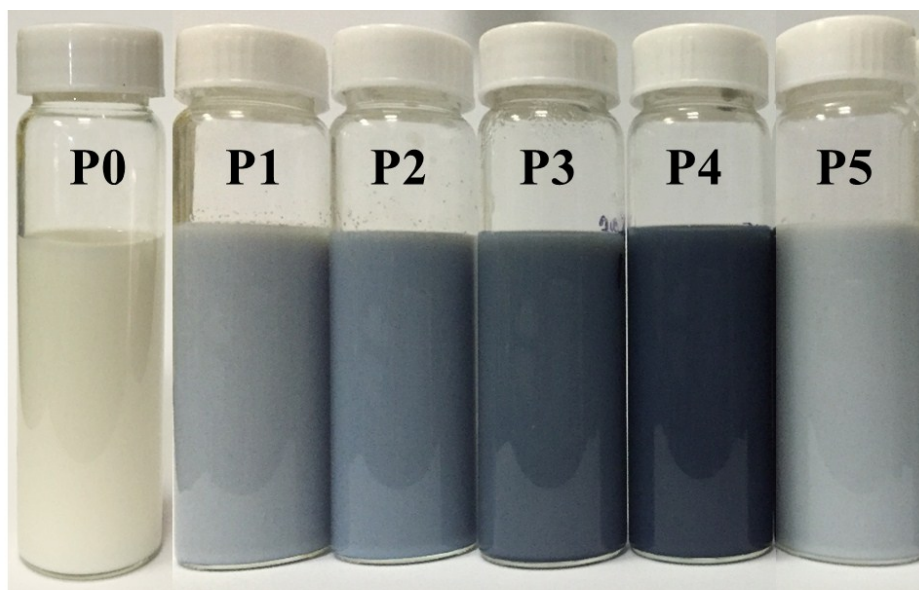

**Figure S4.** Appearances of PS latex P0 and graphene/PS nanocomposite latexes P1-P5

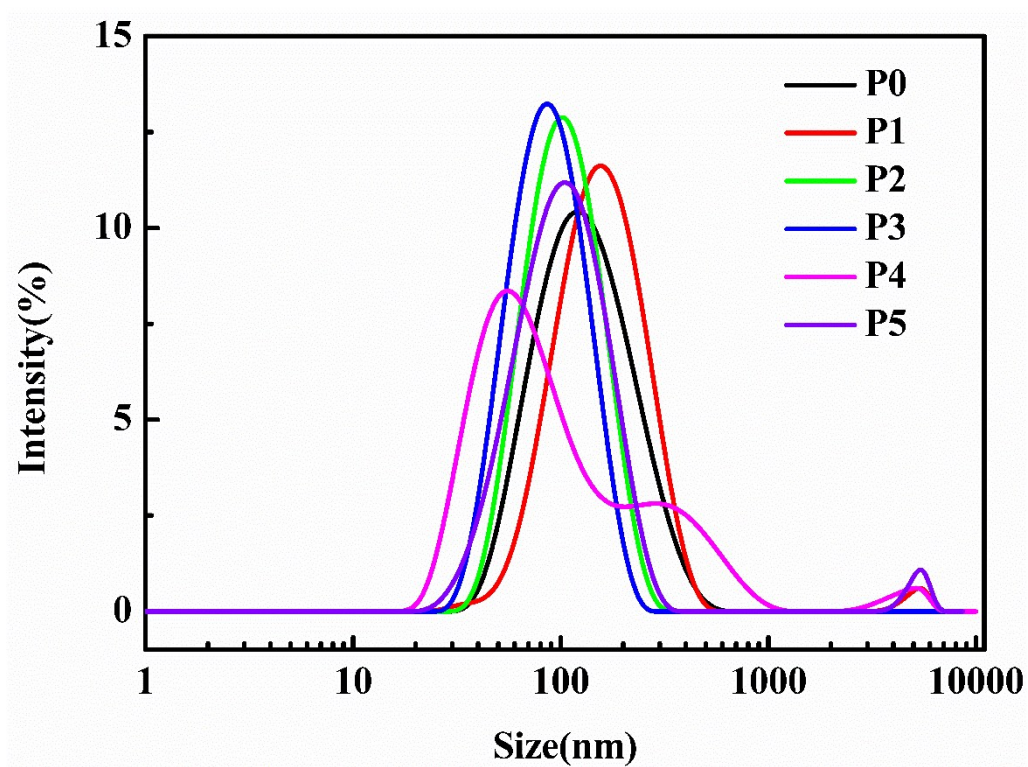

**Figure S5** Particle size distributions of PS latex P0 and graphene/PS nanocomposite latexes P1-P5
